# Supplementary material for: Radiomics and MGMT promoter methylation for prognostication of newly diagnosed glioblastoma
Source: PubMed Central journal article supplement (PMC6783410; doi:10.1038/s41598-019-50849-y), 2019-10-08
Supplement: 41598_2019_50849_MOESM2_ESM.pdf [file 41598_2019_50849_MOESM2_ESM.pdf]

**Supplementary Table****Radiomics and *MGMT* promoter methylation for prognostication of newly diagnosed glioblastoma**

Takahiro Sasaki <sup>1,2,3</sup>, Manabu Kinoshita <sup>2,4,5\*</sup>, Koji Fujita <sup>2,3</sup>, Junya Fukai <sup>2,3</sup>, Nobuhide Hayashi <sup>1,2</sup>, Yuji Uematsu <sup>2,3</sup>, Yoshiko Okita <sup>2,6</sup>, Masahiro Nonaka <sup>2,6,7</sup>, Shusuke Moriuchi <sup>2,6,8</sup>, Takehiro Uda <sup>2,9</sup>, Naohiro Tsuyuguchi <sup>2,9,10</sup>, Hideyuki Arita <sup>2,5</sup>, Kanji Mori <sup>2,11</sup>, Kenichi Ishibashi <sup>2,12</sup>, Koji Takano <sup>2,13</sup>, Namiko Nishida <sup>2,14</sup>, Tomoko Shofuda <sup>2,15</sup>, Ema Yoshioka <sup>2,15</sup>, Daisuke Kanematsu <sup>2,16</sup>, Yoshinori Kodama <sup>2,17</sup>, Masayuki Mano <sup>2,18</sup>, Naoyuki Nakao <sup>2,3</sup>, Yonehiro Kanemura <sup>2,6,19</sup>

<sup>1</sup>Department of Neurosurgery, Wakayama Rosai Hospital, Wakayama 640-8505, Japan, <sup>2</sup>Kansai Molecular Diagnosis Network for CNS Tumors, Osaka 540-0006, Japan, <sup>3</sup>Department of Neurosurgery, Wakayama Medical University, Wakayama 641-8509, Japan, <sup>4</sup>Department of Neurosurgery, Osaka International Cancer Institute, Osaka 541-8567, Japan, <sup>5</sup>Department of Neurosurgery, Osaka University Graduate School of Medicine, Suita 565-0871, Japan, <sup>6</sup>Department of Neurosurgery, Osaka National Hospital, National Hospital Organization, Osaka 540-0006, Japan, <sup>7</sup>Department of Neurosurgery, Kansai Medical University, Hirakata 573-1191, Japan, <sup>8</sup>Moriuchi Clinic of Neurosurgery, Izumiotsu, Osaka 595-0024, Japan, <sup>9</sup>Department of Neurosurgery, Osaka City University Graduate School of Medicine, Osaka 545-0051, Japan, <sup>10</sup>Department of Neurosurgery, Kindai University Faculty of Medicine, Sayama 589-8511, Japan, <sup>11</sup>Department of Neurosurgery, Kansai Rosai Hospital, Amagasaki 660-8511, Japan, <sup>12</sup>Department of Neurosurgery, Osaka City General Hospital, Osaka 534-0021, Japan, <sup>13</sup>Department of Neurosurgery, Toyonaka Municipal Hospital, Toyonaka 560-8565, Japan, <sup>14</sup>Department of Neurosurgery, Tazuke Kofukai Foundation, Medical Research Institute, Kitano Hospital, Osaka 530-8480, Japan, <sup>15</sup>Division of Stem Cell Research, Department of Biomedical Research and Innovation, Institute for Clinical Research, Osaka National Hospital, National Hospital Organization, Osaka 540-0006, Japan, <sup>16</sup>Division of Regenerative Medicine, Department of Biomedical Research and Innovation, Institute for Clinical Research, Osaka National Hospital, National Hospital Organization, Osaka 540-0006, Japan, <sup>17</sup>Department of Pathology and Applied Neurobiology, Graduate School of Medical Science, Kyoto Prefectural University of Medicine, Kyoto 602-8566, Japan, <sup>18</sup>Department of Pathology, Osaka National Hospital, National Hospital Organization, Osaka 540-0006, Japan, <sup>19</sup>Department of Biomedical Research and Innovation, Institute for Clinical Research, Osaka National Hospital, National Hospital Organization, Osaka 540-0006, Japan

|    | Radiomic designation code             | Contents of values                                                                                                                                        |
|----|---------------------------------------|-----------------------------------------------------------------------------------------------------------------------------------------------------------|
| 1  | T1Gd_original_Total_Surface_Area      | Total surface area ( $A$ ) of T1Gd area.                                                                                                                  |
| 2  | T1Gd_original_Total_Volume            | Total volume ( $V$ ) of T1Gd area.                                                                                                                        |
| 3  | T1Gd_original_Compactness01           | Value calculated by the following equation of T1Gd area;<br>$compactness1 = \frac{V}{\sqrt{\pi} * A^{\frac{2}{3}}}$                                       |
| 4  | T1Gd_original_Compactness02           | Value calculated by the following equation of T1Gd area;<br>$compactness2 = 36\pi \frac{A^2}{V^3}$                                                        |
| 5  | T1Gd_original_Spherical_Disproportion | Value calculated by the following equation of T1Gd area;<br>$spherical\_disproportion = \frac{A}{4\pi * R^2} = \frac{A}{(6\sqrt{\pi} * V)^{\frac{2}{3}}}$ |
| 6  | T1Gd_original_Sphericity              | Value calculated by the following equation of T1Gd area;<br>$sphericity = \frac{(6\pi^2 V)^{\frac{2}{3}}}{A}$                                             |
| 7  | T1Gd_original_Surface_to_Volume_ratio | Value calculated by the following equation of T1Gd area;<br>$surface\_volume\_ratio = \frac{A}{V}$                                                        |
| 8  | T2_original_Total_Surface_Area        | Total surface area ( $A$ ) of T2 area.                                                                                                                    |
| 9  | T2_original_Total_Volume              | Total volume ( $V$ ) of T2 area.                                                                                                                          |
| 10 | T2_original_Compactness01             | Value calculated by the following equation of T2 area;<br>$compactness1 = \frac{V}{\sqrt{\pi} * A^{\frac{2}{3}}}$                                         |
| 11 | T2_original_Compactness02             | Value calculated by the following equation of T2 area;<br>$compactness2 = 36\pi \frac{A^2}{V^3}$                                                          |
| 12 | T2_original_Spherical_Disproportion   | Value calculated by the following equation of T2 area;<br>$spherical\_disproportion = \frac{A}{4\pi * R^2} = \frac{A}{(6\sqrt{\pi} * V)^{\frac{2}{3}}}$   |
| 13 | T2_original_Sphericity                | Value calculated by the following equation of T2 area;<br>$sphericity = \frac{(6\pi^2 V)^{\frac{2}{3}}}{A}$                                               |

|    |                                     |                                                                                                                                       |
|----|-------------------------------------|---------------------------------------------------------------------------------------------------------------------------------------|
| 14 | T2_original_Surface_to_Volume_ratio | Value calculated by the following equation of T2 area;<br>$surface\_volume\_ratio = \frac{A}{V}$                                      |
| 15 | core_MNI_loc0                       | Occupancy rate of area "0" multiplied by 1 of the MNI structural atlas within the core VOI. This area represents white matter.        |
| 16 | core_MNI_loc1                       | Occupancy rate of area "1" multiplied by 2 of the MNI structural atlas within the core VOI. This area represents lateral ventricles.  |
| 17 | core_MNI_loc2                       | Occupancy rate of area "2" multiplied by 3 of the MNI structural atlas within the core VOI. This area represents the cerebrum.        |
| 18 | core_MNI_loc3                       | Occupancy rate of area "3" multiplied by 4 of the MNI structural atlas within the core VOI. This area represents the frontal lobe.    |
| 19 | core_MNI_loc4                       | Occupancy rate of area "4" multiplied by 5 of the MNI structural atlas within the core VOI. This area represents the insular lobe.    |
| 20 | core_MNI_loc5                       | Occupancy rate of area "5" multiplied by 6 of the MNI structural atlas within the core VOI. This area represents the occipital lobe.  |
| 21 | core_MNI_loc6                       | Occupancy rate of area "6" multiplied by 7 of the MNI structural atlas within the core VOI. This area represents the parietal lobe.   |
| 22 | core_MNI_loc7                       | Occupancy rate of area "7" multiplied by 8 of the MNI structural atlas within the core VOI. This area represents the basal ganglia.   |
| 23 | core_MNI_loc8                       | Occupancy rate of area "8" multiplied by 9 of the MNI structural atlas within the core VOI. This area represents the temporal lobe.   |
| 24 | core_MNI_loc9                       | Occupancy rate of area "9" multiplied by 10 of the MNI structural atlas within the core VOI. This area represents the thalamus.       |
| 25 | edema_MNI_loc0                      | Occupancy rate of area "0" multiplied by 1 of the MNI structural atlas within the edema VOI. This area represents white matter.       |
| 26 | edema_MNI_loc1                      | Occupancy rate of area "1" multiplied by 2 of the MNI structural atlas within the edema VOI. This area represents lateral ventricles. |
| 27 | edema_MNI_loc2                      | Occupancy rate of area "2" multiplied by 3 of the MNI structural atlas within the edema VOI. This area represents the cerebrum.       |
| 28 | edema_MNI_loc3                      | Occupancy rate of area "3" multiplied by 4 of the MNI structural atlas within the edema VOI. This area represents the frontal lobe.   |
| 29 | edema_MNI_loc4                      | Occupancy rate of area "4" multiplied by 5 of the MNI structural atlas within the edema VOI. This area represents the insular lobe.   |
| 30 | edema_MNI_loc5                      | Occupancy rate of area "5" multiplied by 6 of the MNI structural atlas within the edema VOI. This area represents the occipital lobe. |
| 31 | edema_MNI_loc6                      | Occupancy rate of area "6" multiplied by 7 of the MNI structural atlas within the edema VOI. This area represents the parietal lobe.  |
| 32 | edema_MNI_loc7                      | Occupancy rate of area "7" multiplied by 8 of the MNI structural atlas within the edema VOI. This area represents the basal ganglia.  |
| 33 | edema_MNI_loc8                      | Occupancy rate of area "8" multiplied by 9 of the MNI structural atlas within the edema VOI. This area represents the temporal lobe.  |

|    |                             |                                                                                                                                  |
|----|-----------------------------|----------------------------------------------------------------------------------------------------------------------------------|
| 34 | edema_MNI_loc9              | Occupancy rate of area "9" multiplied by 10 of the MNI structural atlas within the edema VOI. This area represents the thalamus. |
| 35 | T1Gd_core_Mean              | Mean of VOI_core in 256-leveled Gadolinium enhanced T1-weighted image.                                                           |
| 36 | T1Gd_core_SD                | Standard deviation of VOI_core in 256-leveled Gadolinium enhanced T1-weighted image.                                             |
| 37 | T1Gd_core_Var               | Variance of VOI_core in 256-leveled Gadolinium enhanced T1-weighted image.                                                       |
| 38 | T1Gd_core_RMS               | Root Mean Square of VOI_core in 256-leveled Gadolinium enhanced T1-weighted image.                                               |
| 39 | T1Gd_core_Max               | Maximum of VOI_core in 256-leveled Gadolinium enhanced T1-weighted image.                                                        |
| 40 | T1Gd_core_Min               | Minimum of VOI_core in 256-leveled Gadolinium enhanced T1-weighted image.                                                        |
| 41 | T1Gd_core_Median            | Median of VOI_core in 256-leveled Gadolinium enhanced T1-weighted image.                                                         |
| 42 | T1Gd_core_Mode              | Mode of VOI_core in 256-leveled Gadolinium enhanced T1-weighted image.                                                           |
| 43 | T1Gd_core_Entropy           | Entropy of VOI_core in 256-leveled Gadolinium enhanced T1-weighted image.                                                        |
| 44 | T1Gd_core_Kurtosis          | Kurtosis of VOI_core in 256-leveled Gadolinium enhanced T1-weighted image.                                                       |
| 45 | T1Gd_core_Skewness          | Skewness of VOI_core in 256-leveled Gadolinium enhanced T1-weighted image.                                                       |
| 46 | T1Gd_core_GLCMcontrast_1    | Mean contrast of GLCM in VOI_core in 256-leveled Gadolinium enhanced T1-weighted image with offset set to 1.                     |
| 47 | T1Gd_core_GLCMcontrast_2    | Mean contrast of GLCM in VOI_core in 256-leveled Gadolinium enhanced T1-weighted image with offset set to 2.                     |
| 48 | T1Gd_core_GLCMcontrast_3    | Mean contrast of GLCM in VOI_core in 256-leveled Gadolinium enhanced T1-weighted image with offset set to 3.                     |
| 49 | T1Gd_core_GLCMenergy_1      | Mean energy of GLCM in VOI_core in 256-leveled Gadolinium enhanced T1-weighted image with offset set to 1.                       |
| 50 | T1Gd_core_GLCMenergy_2      | Mean energy of GLCM in VOI_core in 256-leveled Gadolinium enhanced T1-weighted image with offset set to 2.                       |
| 51 | T1Gd_core_GLCMenergy_3      | Mean energy of GLCM in VOI_core in 256-leveled Gadolinium enhanced T1-weighted image with offset set to 3.                       |
| 52 | T1Gd_core_GLCMhomogeneity_1 | Mean homogeneity of GLCM in VOI_core in 256-leveled Gadolinium enhanced T1-weighted image with offset set to 1.                  |
| 53 | T1Gd_core_GLCMhomogeneity_2 | Mean homogeneity of GLCM in VOI_core in 256-leveled Gadolinium enhanced T1-weighted image with offset set to 2.                  |
| 54 | T1Gd_core_GLCMhomogeneity_3 | Mean homogeneity of GLCM in VOI_core in 256-leveled Gadolinium enhanced T1-weighted image with offset set to 3.                  |
| 55 | T1Gd_core_GLRLMSre          | Short run emphasis of GLRLM in VOI_core in 256-leveled Gadolinium enhanced T1-weighted image.                                    |
| 56 | T1Gd_core_GLRLMLre          | Long run emphasis of GLRLM in VOI_core in 256-leveled Gadolinium enhanced T1-weighted image.                                     |
| 57 | T1Gd_core_GLRLMGLn          | GRAY LEVEL NON-UNIFORMITY of GLRLM in VOI_core in 256-leveled Gadolinium enhanced T1-weighted image.                             |
| 58 | T1Gd_core_GLRLMRp           | RUN PERCENTAGE of GLRLM in VOI_core in 256-leveled Gadolinium enhanced T1-weighted image.                                        |

|    |                                |                                                                                                                                  |
|----|--------------------------------|----------------------------------------------------------------------------------------------------------------------------------|
| 59 | T1Gd_core_GLRLMRln             | RUN LENGTH NON-UNIFORMITY in VOI_core in 256-leveled Gadolinium enhanced T1-weighted image.                                      |
| 60 | T1Gd_core_GLRLMLrge            | LOW GRAY LEVEL RUN EMPHASIS in VOI_core in 256-leveled Gadolinium enhanced T1-weighted image.                                    |
| 61 | T1Gd_core_GLRLMHrg             | HIGH GRAY LEVEL RUN EMPHASIS in VOI_core in 256-leveled Gadolinium enhanced T1-weighted image.                                   |
| 62 | T1Gd_core_GLCMcontrast_1_SD    | Standard deviation of contrast of GLCM in VOI_core in 256-leveled Gadolinium enhanced T1-weighted image with offset set to 1.    |
| 63 | T1Gd_core_GLCMcontrast_2_SD    | Standard deviation of contrast of GLCM in VOI_core in 256-leveled Gadolinium enhanced T1-weighted image with offset set to 2.    |
| 64 | T1Gd_core_GLCMcontrast_3_SD    | Standard deviation of contrast of GLCM in VOI_core in 256-leveled Gadolinium enhanced T1-weighted image with offset set to 3.    |
| 65 | T1Gd_core_GLCMenergy_1_SD      | Standard deviation of energy of GLCM in VOI_core in 256-leveled Gadolinium enhanced T1-weighted image with offset set to 1.      |
| 66 | T1Gd_core_GLCMenergy_2_SD      | Standard deviation of energy of GLCM in VOI_core in 256-leveled Gadolinium enhanced T1-weighted image with offset set to 2.      |
| 67 | T1Gd_core_GLCMenergy_3_SD      | Standard deviation of energy of GLCM in VOI_core in 256-leveled Gadolinium enhanced T1-weighted image with offset set to 3.      |
| 68 | T1Gd_core_GLCMhomogeneity_1_SD | Standard deviation of homogeneity of GLCM in VOI_core in 256-leveled Gadolinium enhanced T1-weighted image with offset set to 1. |
| 69 | T1Gd_core_GLCMhomogeneity_2_SD | Standard deviation of homogeneity of GLCM in VOI_core in 256-leveled Gadolinium enhanced T1-weighted image with offset set to 2. |
| 70 | T1Gd_core_GLCMhomogeneity_3_SD | Standard deviation of homogeneity of GLCM in VOI_core in 256-leveled Gadolinium enhanced T1-weighted image with offset set to 3. |
| 71 | T1Gd_core_GLRLMSre_SD          | Standard deviation of Short run emphasis of GLRLM in VOI_core in 256-leveled Gadolinium enhanced T1-weighted image.              |
| 72 | T1Gd_core_GLRLMLre_SD          | Standard deviation of Long run emphasis of GLRLM in VOI_core in 256-leveled Gadolinium enhanced T1-weighted image.               |
| 73 | T1Gd_core_GLRLMGLn_SD          | Standard deviation of GRAY LEVEL NON-UNIFORMITY of GLRLM in VOI_core in 256-leveled Gadolinium enhanced T1-weighted image.       |
| 74 | T1Gd_core_GLRLMRp_SD           | Standard deviation of RUN PERCENTAGE of GLRLM in VOI_core in 256-leveled Gadolinium enhanced T1-weighted image.                  |
| 75 | T1Gd_core_GLRLMRln_SD          | Standard deviation of RUN LENGTH NON-UNIFORMITY in VOI_core in 256-leveled Gadolinium enhanced T1-weighted image.                |
| 76 | T1Gd_core_GLRLMLrge_SD         | Standard deviation of LOW GRAY LEVEL RUN EMPHASIS in VOI_core in 256-leveled Gadolinium enhanced T1-weighted image.              |
| 77 | T1Gd_core_GLRLMHrge_SD         | Standard deviation of HIGH GRAY LEVEL RUN EMPHASIS in VOI_core in 256-leveled Gadolinium enhanced T1-weighted image.             |
| 78 | T1Gd_edema_Mean                | Mean of VOI_edema in 256-leveled Gadolinium enhanced T1-weighted image.                                                          |
| 79 | T1Gd_edema_SD                  | Standard deviation of VOI_edema in 256-leveled Gadolinium enhanced T1-weighted image.                                            |
| 80 | T1Gd_edema_Var                 | Variance of VOI_edema in 256-leveled Gadolinium enhanced T1-weighted image.                                                      |

|     |                              |                                                                                                                  |
|-----|------------------------------|------------------------------------------------------------------------------------------------------------------|
| 81  | T1Gd_edema_RMS               | Root Mean Square of VOI_edema in 256-leveled Gadolinium enhanced T1-weighted image.                              |
| 82  | T1Gd_edema_Max               | Maximum of VOI_edema in 256-leveled Gadolinium enhanced T1-weighted image.                                       |
| 83  | T1Gd_edema_Min               | Minimum of VOI_edema in 256-leveled Gadolinium enhanced T1-weighted image.                                       |
| 84  | T1Gd_edema_Median            | Median of VOI_edema in 256-leveled Gadolinium enhanced T1-weighted image.                                        |
| 85  | T1Gd_edema_Mode              | Mode of VOI_edema in 256-leveled Gadolinium enhanced T1-weighted image.                                          |
| 86  | T1Gd_edema_Entropy           | Entropy of VOI_edema in 256-leveled Gadolinium enhanced T1-weighted image.                                       |
| 87  | T1Gd_edema_Kurtosis          | Kurtosis of VOI_edema in 256-leveled Gadolinium enhanced T1-weighted image.                                      |
| 88  | T1Gd_edema_Skewness          | Skewness of VOI_edema in 256-leveled Gadolinium enhanced T1-weighted image.                                      |
| 89  | T1Gd_edema_GLCMcontrast_1    | Mean contrast of GLCM in VOI_edema in 256-leveled Gadolinium enhanced T1-weighted image with offset set to 1.    |
| 90  | T1Gd_edema_GLCMcontrast_2    | Mean contrast of GLCM in VOI_edema in 256-leveled Gadolinium enhanced T1-weighted image with offset set to 2.    |
| 91  | T1Gd_edema_GLCMcontrast_3    | Mean contrast of GLCM in VOI_edema in 256-leveled Gadolinium enhanced T1-weighted image with offset set to 3.    |
| 92  | T1Gd_edema_GLCMenergy_1      | Mean energy of GLCM in VOI_edema in 256-leveled Gadolinium enhanced T1-weighted image with offset set to 1.      |
| 93  | T1Gd_edema_GLCMenergy_2      | Mean energy of GLCM in VOI_edema in 256-leveled Gadolinium enhanced T1-weighted image with offset set to 2.      |
| 94  | T1Gd_edema_GLCMenergy_3      | Mean energy of GLCM in VOI_edema in 256-leveled Gadolinium enhanced T1-weighted image with offset set to 3.      |
| 95  | T1Gd_edema_GLCMhomogeneity_1 | Mean homogeneity of GLCM in VOI_edema in 256-leveled Gadolinium enhanced T1-weighted image with offset set to 1. |
| 96  | T1Gd_edema_GLCMhomogeneity_2 | Mean homogeneity of GLCM in VOI_edema in 256-leveled Gadolinium enhanced T1-weighted image with offset set to 2. |
| 97  | T1Gd_edema_GLCMhomogeneity_3 | Mean homogeneity of GLCM in VOI_edema in 256-leveled Gadolinium enhanced T1-weighted image with offset set to 3. |
| 98  | T1Gd_edema_GLRLMShort        | Short run emphasis of GLRLM in VOI_edema in 256-leveled Gadolinium enhanced T1-weighted image.                   |
| 99  | T1Gd_edema_GLRLMLong         | Long run emphasis of GLRLM in VOI_edema in 256-leveled Gadolinium enhanced T1-weighted image.                    |
| 100 | T1Gd_edema_GLRLMGLN          | GRAY LEVEL NON-UNIFORMITY of GLRLM in VOI_edema in 256-leveled Gadolinium enhanced T1-weighted image.            |
| 101 | T1Gd_edema_GLRLMRP           | RUN PERCENTAGE of GLRLM in VOI_edema in 256-leveled Gadolinium enhanced T1-weighted image.                       |
| 102 | T1Gd_edema_GLRLMRLN          | RUN LENGTH NON-UNIFORMITY in VOI_edema in 256-leveled Gadolinium enhanced T1-weighted image.                     |
| 103 | T1Gd_edema_GLRLMLRge         | LOW GRAY LEVEL RUN EMPHASIS in VOI_edema in 256-leveled Gadolinium enhanced T1-weighted image.                   |
| 104 | T1Gd_edema_GLRLMHRge         | HIGH GRAY LEVEL RUN EMPHASIS in VOI_edema in 256-leveled Gadolinium enhanced T1-weighted image.                  |

|     |                                 |                                                                                                                                   |
|-----|---------------------------------|-----------------------------------------------------------------------------------------------------------------------------------|
| 105 | T1Gd_edema_GLCMcontrast_1_SD    | Standard deviation of contrast of GLCM in VOI_edema in 256-leveled Gadolinium enhanced T1-weighted image with offset set to 1.    |
| 106 | T1Gd_edema_GLCMcontrast_2_SD    | Standard deviation of contrast of GLCM in VOI_edema in 256-leveled Gadolinium enhanced T1-weighted image with offset set to 2.    |
| 107 | T1Gd_edema_GLCMcontrast_3_SD    | Standard deviation of contrast of GLCM in VOI_edema in 256-leveled Gadolinium enhanced T1-weighted image with offset set to 3.    |
| 108 | T1Gd_edema_GLCMenergy_1_SD      | Standard deviation of energy of GLCM in VOI_edema in 256-leveled Gadolinium enhanced T1-weighted image with offset set to 1.      |
| 109 | T1Gd_edema_GLCMenergy_2_SD      | Standard deviation of energy of GLCM in VOI_edema in 256-leveled Gadolinium enhanced T1-weighted image with offset set to 2.      |
| 110 | T1Gd_edema_GLCMenergy_3_SD      | Standard deviation of energy of GLCM in VOI_edema in 256-leveled Gadolinium enhanced T1-weighted image with offset set to 3.      |
| 111 | T1Gd_edema_GLCMhomogeneity_1_SD | Standard deviation of homogeneity of GLCM in VOI_edema in 256-leveled Gadolinium enhanced T1-weighted image with offset set to 1. |
| 112 | T1Gd_edema_GLCMhomogeneity_2_SD | Standard deviation of homogeneity of GLCM in VOI_edema in 256-leveled Gadolinium enhanced T1-weighted image with offset set to 2. |
| 113 | T1Gd_edema_GLCMhomogeneity_3_SD | Standard deviation of homogeneity of GLCM in VOI_edema in 256-leveled Gadolinium enhanced T1-weighted image with offset set to 3. |
| 114 | T1Gd_edema_GLRLMSre_SD          | Standard deviation of Short run emphasis of GLRLM in VOI_edema in 256-leveled Gadolinium enhanced T1-weighted image.              |
| 115 | T1Gd_edema_GLRLMLre_SD          | Standard deviation of Long run emphasis of GLRLM in VOI_edema in 256-leveled Gadolinium enhanced T1-weighted image.               |
| 116 | T1Gd_edema_GLRLMGLn_SD          | Standard deviation of GRAY LEVEL NON-UNIFORMITY of GLRLM in VOI_edema in 256-leveled Gadolinium enhanced T1-weighted image.       |
| 117 | T1Gd_edema_GLRLMRp_SD           | Standard deviation of RUN PERCENTAGE of GLRLM in VOI_edema in 256-leveled Gadolinium enhanced T1-weighted image.                  |
| 118 | T1Gd_edema_GLRLMRLn_SD          | Standard deviation of RUN LENGTH NON-UNIFORMITY in VOI_edema in 256-leveled Gadolinium enhanced T1-weighted image.                |
| 119 | T1Gd_edema_GLRLMLrge_SD         | Standard deviation of LOW GRAY LEVEL RUN EMPHASIS in VOI_edema in 256-leveled Gadolinium enhanced T1-weighted image.              |
| 120 | T1Gd_edema_GLRLMhrge_SD         | Standard deviation of HIGH GRAY LEVEL RUN EMPHASIS in VOI_edema in 256-leveled Gadolinium enhanced T1-weighted image.             |
| 121 | T2_core_Mean                    | Mean of VOI_core in 256-leveled T2-weighted image.                                                                                |
| 122 | T2_core_SD                      | Standard deviation of VOI_core in 256-leveled T2-weighted image.                                                                  |
| 123 | T2_core_Var                     | Variance of VOI_core in 256-leveled T2-weighted image.                                                                            |
| 124 | T2_core_RMS                     | Root Mean Square of VOI_core in 256-leveled T2-weighted image.                                                                    |
| 125 | T2_core_Max                     | Maximum of VOI_core in 256-leveled T2-weighted image.                                                                             |
| 126 | T2_core_Min                     | Minimum of VOI_core in 256-leveled T2-weighted image.                                                                             |

|     |                           |                                                                                                           |
|-----|---------------------------|-----------------------------------------------------------------------------------------------------------|
| 127 | T2_core_Median            | Median of VOI_core in 256-leveled T2-weighted image.                                                      |
| 128 | T2_core_Mode              | Mode of VOI_core in 256-leveled T2-weighted image.                                                        |
| 129 | T2_core_Entropy           | Entropy of VOI_core in 256-leveled T2-weighted image.                                                     |
| 130 | T2_core_Kurtosis          | Kurtosis of VOI_core in 256-leveled T2-weighted image.                                                    |
| 131 | T2_core_Skewness          | Skewness of VOI_core in 256-leveled T2-weighted image.                                                    |
| 132 | T2_core_GLCMcontrast_1    | Mean contrast of GLCM in VOI_core in 256-leveled T2-weighted image with offset set to 1.                  |
| 133 | T2_core_GLCMcontrast_2    | Mean contrast of GLCM in VOI_core in 256-leveled T2-weighted image with offset set to 2.                  |
| 134 | T2_core_GLCMcontrast_3    | Mean contrast of GLCM in VOI_core in 256-leveled T2-weighted image with offset set to 3.                  |
| 135 | T2_core_GLCMenergy_1      | Mean energy of GLCM in VOI_core in 256-leveled T2-weighted image with offset set to 1.                    |
| 136 | T2_core_GLCMenergy_2      | Mean energy of GLCM in VOI_core in 256-leveled T2-weighted image with offset set to 2.                    |
| 137 | T2_core_GLCMenergy_3      | Mean energy of GLCM in VOI_core in 256-leveled T2-weighted image with offset set to 3.                    |
| 138 | T2_core_GLCMhomogeneity_1 | Mean homogeneity of GLCM in VOI_core in 256-leveled T2-weighted image with offset set to 1.               |
| 139 | T2_core_GLCMhomogeneity_2 | Mean homogeneity of GLCM in VOI_core in 256-leveled T2-weighted image with offset set to 2.               |
| 140 | T2_core_GLCMhomogeneity_3 | Mean homogeneity of GLCM in VOI_core in 256-leveled T2-weighted image with offset set to 3.               |
| 141 | T2_core_GLRLMSre          | Short run emphasis of GLRLM in VOI_core in 256-leveled T2-weighted image.                                 |
| 142 | T2_core_GLRLMLre          | Long run emphasis of GLRLM in VOI_core in 256-leveled T2-weighted image.                                  |
| 143 | T2_core_GLRLMGl_n         | GRAY LEVEL NON-UNIFORMITY of GLRLM in VOI_core in 256-leveled T2-weighted image.                          |
| 144 | T2_core_GLRLMRp           | RUN PERCENTAGE of GLRLM in VOI_core in 256-leveled T2-weighted image.                                     |
| 145 | T2_core_GLRLMRl_n         | RUN LENGTH NON-UNIFORMITY in VOI_core in 256-leveled T2-weighted image.                                   |
| 146 | T2_core_GLRLMLrge         | LOW GRAY LEVEL RUN EMPHASIS in VOI_core in 256-leveled T2-weighted image.                                 |
| 147 | T2_core_GLRLMhrge         | HIGH GRAY LEVEL RUN EMPHASIS in VOI_core in 256-leveled T2-weighted image.                                |
| 148 | T2_core_GLCMcontrast_1_SD | Standard deviation of contrast of GLCM in VOI_core in 256-leveled T2-weighted image with offset set to 1. |
| 149 | T2_core_GLCMcontrast_2_SD | Standard deviation of contrast of GLCM in VOI_core in 256-leveled T2-weighted image with offset set to 2. |
| 150 | T2_core_GLCMcontrast_3_SD | Standard deviation of contrast of GLCM in VOI_core in 256-leveled T2-weighted image with offset set to 3. |
| 151 | T2_core_GLCMenergy_1_SD   | Standard deviation of energy of GLCM in VOI_core in 256-leveled T2-weighted image with offset set to 1.   |
| 152 | T2_core_GLCMenergy_2_SD   | Standard deviation of energy of GLCM in VOI_core in 256-leveled T2-weighted image with offset set to 2.   |
| 153 | T2_core_GLCMenergy_3_SD   | Standard deviation of energy of GLCM in VOI_core in 256-leveled T2-weighted image with offset set to 3.   |



|     |                              |                                                                                                              |
|-----|------------------------------|--------------------------------------------------------------------------------------------------------------|
| 154 | T2_core_GLCMhomogeneity_1_SD | Standard deviation of homogeneity of GLCM in VOI_core in 256-leveled T2-weighted image with offset set to 1. |
| 155 | T2_core_GLCMhomogeneity_2_SD | Standard deviation of homogeneity of GLCM in VOI_core in 256-leveled T2-weighted image with offset set to 2. |
| 156 | T2_core_GLCMhomogeneity_3_SD | Standard deviation of homogeneity of GLCM in VOI_core in 256-leveled T2-weighted image with offset set to 3. |
| 157 | T2_core_GLRLMSre_SD          | Standard deviation of Short run emphasis of GLRLM in VOI_core in 256-leveled T2-weighted image.              |
| 158 | T2_core_GLRLMLre_SD          | Standard deviation of Long run emphasis of GLRLM in VOI_core in 256-leveled T2-weighted image.               |
| 159 | T2_core_GLRLMGLn_SD          | Standard deviation of GRAY LEVEL NON-UNIFORMITY of GLRLM in VOI_core in 256-leveled T2-weighted image.       |
| 160 | T2_core_GLRLMRp_SD           | Standard deviation of RUN PERCENTAGE of GLRLM in VOI_core in 256-leveled T2-weighted image.                  |
| 161 | T2_core_GLRLMRln_SD          | Standard deviation of RUN LENGTH NON-UNIFORMITY in VOI_core in 256-leveled T2-weighted image.                |
| 162 | T2_core_GLRLMLrge_SD         | Standard deviation of LOW GRAY LEVEL RUN EMPHASIS in VOI_core in 256-leveled T2-weighted image.              |
| 163 | T2_core_GLRLMHrge_SD         | Standard deviation of HIGH GRAY LEVEL RUN EMPHASIS in VOI_core in 256-leveled T2-weighted image.             |
| 164 | T2_edema_Mean                | Mean of VOI_edema in 256-leveled T2-weighted image.                                                          |
| 165 | T2_edema_SD                  | Standard deviation of VOI_edema in 256-leveled T2-weighted image.                                            |
| 166 | T2_edema_Var                 | Variance of VOI_edema in 256-leveled T2-weighted image.                                                      |
| 167 | T2_edema_RMS                 | Root Mean Square of VOI_edema in 256-leveled T2-weighted image.                                              |
| 168 | T2_edema_Max                 | Maximum of VOI_edema in 256-leveled T2-weighted image.                                                       |
| 169 | T2_edema_Min                 | Minimum of VOI_edema in 256-leveled T2-weighted image.                                                       |
| 170 | T2_edema_Median              | Median of VOI_edema in 256-leveled T2-weighted image.                                                        |
| 171 | T2_edema_Mode                | Mode of VOI_edema in 256-leveled T2-weighted image.                                                          |
| 172 | T2_edema_Entropy             | Entropy of VOI_edema in 256-leveled T2-weighted image.                                                       |
| 173 | T2_edema_Kurtosis            | Kurtosis of VOI_edema in 256-leveled T2-weighted image.                                                      |
| 174 | T2_edema_Skewness            | Skewness of VOI_edema in 256-leveled T2-weighted image.                                                      |
| 175 | T2_edema_GLCMcontrast_1      | Mean contrast of GLCM in VOI_edema in 256-leveled T2-weighted image with offset set to 1.                    |
| 176 | T2_edema_GLCMcontrast_2      | Mean contrast of GLCM in VOI_edema in 256-leveled T2-weighted image with offset set to 2.                    |
| 177 | T2_edema_GLCMcontrast_3      | Mean contrast of GLCM in VOI_edema in 256-leveled T2-weighted image with offset set to 3.                    |
| 178 | T2_edema_GLCMenergy_1        | Mean energy of GLCM in VOI_edema in 256-leveled T2-weighted image with offset set to 1.                      |
| 179 | T2_edema_GLCMenergy_2        | Mean energy of GLCM in VOI_edema in 256-leveled T2-weighted image with offset set to 2.                      |
| 180 | T2_edema_GLCMenergy_3        | Mean energy of GLCM in VOI_edema in 256-leveled T2-weighted image with offset set to 3.                      |

|     |                               |                                                                                                                |
|-----|-------------------------------|----------------------------------------------------------------------------------------------------------------|
| 181 | T2_edema_GLCMhomogeneity_1    | Mean homogeneity of GLCM in VOI_edema in 256-levelled T2-weighted image with offset set to 1.                  |
| 182 | T2_edema_GLCMhomogeneity_2    | Mean homogeneity of GLCM in VOI_edema in 256-levelled T2-weighted image with offset set to 2.                  |
| 183 | T2_edema_GLCMhomogeneity_3    | Mean homogeneity of GLCM in VOI_edema in 256-levelled T2-weighted image with offset set to 3.                  |
| 184 | T2_edema_GLRLMSre             | Short run emphasis of GLRLM in VOI_edema in 256-levelled T2-weighted image.                                    |
| 185 | T2_edema_GLRLMLre             | Long run emphasis of GLRLM in VOI_edema in 256-levelled T2-weighted image.                                     |
| 186 | T2_edema_GLRLMGln             | GRAY LEVEL NON-UNIFORMITY of GLRLM in VOI_edema in 256-levelled T2-weighted image.                             |
| 187 | T2_edema_GLRLMRp              | RUN PERCENTAGE of GLRLM in VOI_edema in 256-levelled T2-weighted image.                                        |
| 188 | T2_edema_GLRLMRln             | RUN LENGTH NON-UNIFORMITY in VOI_edema in 256-levelled T2-weighted image.                                      |
| 189 | T2_edema_GLRLMLrge            | LOW GRAY LEVEL RUN EMPHASIS in VOI_edema in 256-levelled T2-weighted image.                                    |
| 190 | T2_edema_GLRLMRhge            | HIGH GRAY LEVEL RUN EMPHASIS in VOI_edema in 256-levelled T2-weighted image.                                   |
| 191 | T2_edema_GLCMcontrast_1_SD    | Standard deviation of contrast of GLCM in VOI_edema in 256-levelled T2-weighted image with offset set to 1.    |
| 192 | T2_edema_GLCMcontrast_2_SD    | Standard deviation of contrast of GLCM in VOI_edema in 256-levelled T2-weighted image with offset set to 2.    |
| 193 | T2_edema_GLCMcontrast_3_SD    | Standard deviation of contrast of GLCM in VOI_edema in 256-levelled T2-weighted image with offset set to 3.    |
| 194 | T2_edema_GLCMenergy_1_SD      | Standard deviation of energy of GLCM in VOI_edema in 256-levelled T2-weighted image with offset set to 1.      |
| 195 | T2_edema_GLCMenergy_2_SD      | Standard deviation of energy of GLCM in VOI_edema in 256-levelled T2-weighted image with offset set to 2.      |
| 196 | T2_edema_GLCMenergy_3_SD      | Standard deviation of energy of GLCM in VOI_edema in 256-levelled T2-weighted image with offset set to 3.      |
| 197 | T2_edema_GLCMhomogeneity_1_SD | Standard deviation of homogeneity of GLCM in VOI_edema in 256-levelled T2-weighted image with offset set to 1. |
| 198 | T2_edema_GLCMhomogeneity_2_SD | Standard deviation of homogeneity of GLCM in VOI_edema in 256-levelled T2-weighted image with offset set to 2. |
| 199 | T2_edema_GLCMhomogeneity_3_SD | Standard deviation of homogeneity of GLCM in VOI_edema in 256-levelled T2-weighted image with offset set to 3. |
| 200 | T2_edema_GLRLMSre_SD          | Standard deviation of Short run emphasis of GLRLM in VOI_edema in 256-levelled T2-weighted image.              |
| 201 | T2_edema_GLRLMLre_SD          | Standard deviation of Long run emphasis of GLRLM in VOI_edema in 256-levelled T2-weighted image.               |
| 202 | T2_edema_GLRLMGln_SD          | Standard deviation of GRAY LEVEL NON-UNIFORMITY of GLRLM in VOI_edema in 256-levelled T2-weighted image.       |
| 203 | T2_edema_GLRLMRp_SD           | Standard deviation of RUN PERCENTAGE of GLRLM in VOI_edema in 256-levelled T2-weighted image.                  |
| 204 | T2_edema_GLRLMRln_SD          | Standard deviation of RUN LENGTH NON-UNIFORMITY in VOI_edema in 256-levelled T2-weighted image.                |

|     |                                  |                                                                                                                |
|-----|----------------------------------|----------------------------------------------------------------------------------------------------------------|
| 205 | T2_edema_GLRLMLrge_SD            | Standard deviation of LOW GRAY LEVEL RUN EMPHASIS in VOI_edema in 256-leveled T2-weighted image.               |
| 206 | T2_edema_GLRLMHRge_SD            | Standard deviation of HIGH GRAY LEVEL RUN EMPHASIS in VOI_edema in 256-leveled T2-weighted image.              |
| 207 | T2_prewitt_rim_Mean              | Mean of rim of VOI Prewitt filtered 1) 256-leveled T2-weighted image.                                          |
| 208 | T2_prewitt_rim_SD                | Standard deviation of Rim of VOI Prewitt filtered 1) 256-leveled T2-weighted image.                            |
| 209 | T2_prewitt_rim_Var               | Variance of Rim of VOI Prewitt filtered 1) 256-leveled T2-weighted image.                                      |
| 210 | T2_prewitt_rim_RMS               | Root Mean Square of Rim of VOI Prewitt filtered 1) 256-leveled T2-weighted image.                              |
| 211 | T2_prewitt_rim_Max               | Maximum of Rim of VOI Prewitt filtered 1) 256-leveled T2-weighted image.                                       |
| 212 | T2_prewitt_rim_Min               | Minimum of Rim of VOI Prewitt filtered 1) 256-leveled T2-weighted image.                                       |
| 213 | T2_prewitt_rim_Median            | Median of Rim of VOI Prewitt filtered 1) 256-leveled T2-weighted image.                                        |
| 214 | T2_prewitt_rim_Mode              | Mode of Rim of VOI Prewitt filtered 1) 256-leveled T2-weighted image.                                          |
| 215 | T2_prewitt_rim_Entropy           | Entropy of Rim of VOI Prewitt filtered 1) 256-leveled T2-weighted image.                                       |
| 216 | T2_prewitt_rim_Kurtosis          | Kurtosis of Rim of VOI Prewitt filtered 1) 256-leveled T2-weighted image.                                      |
| 217 | T2_prewitt_rim_Skewness          | Skewness of Rim of VOI Prewitt filtered 1) 256-leveled T2-weighted image.                                      |
| 218 | T2_prewitt_rim_GLCMcontrast_1    | Mean contrast of GLCM in Rim of VOI Prewitt filtered 1) 256-leveled T2-weighted image with offset set to 1.    |
| 219 | T2_prewitt_rim_GLCMcontrast_2    | Mean contrast of GLCM in Rim of VOI Prewitt filtered 1) 256-leveled T2-weighted image with offset set to 2.    |
| 220 | T2_prewitt_rim_GLCMcontrast_3    | Mean contrast of GLCM in Rim of VOI Prewitt filtered 1) 256-leveled T2-weighted image with offset set to 3.    |
| 221 | T2_prewitt_rim_GLCMenergy_1      | Mean energy of GLCM in Rim of VOI Prewitt filtered 1) 256-leveled T2-weighted image with offset set to 1.      |
| 222 | T2_prewitt_rim_GLCMenergy_2      | Mean energy of GLCM in Rim of VOI Prewitt filtered 1) 256-leveled T2-weighted image with offset set to 2.      |
| 223 | T2_prewitt_rim_GLCMenergy_3      | Mean energy of GLCM in Rim of VOI Prewitt filtered 1) 256-leveled T2-weighted image with offset set to 3.      |
| 224 | T2_prewitt_rim_GLCMhomogeneity_1 | Mean homogeneity of GLCM in Rim of VOI Prewitt filtered 1) 256-leveled T2-weighted image with offset set to 1. |
| 225 | T2_prewitt_rim_GLCMhomogeneity_2 | Mean homogeneity of GLCM in Rim of VOI Prewitt filtered 1) 256-leveled T2-weighted image with offset set to 2. |
| 226 | T2_prewitt_rim_GLCMhomogeneity_3 | Mean homogeneity of GLCM in Rim of VOI Prewitt filtered 1) 256-leveled T2-weighted image with offset set to 3. |
| 227 | T2_prewitt_rim_GLR_LMSre         | Short run emphasis of GLRLM in Rim of VOI Prewitt filtered 1) 256-leveled T2-weighted image.                   |
| 228 | T2_prewitt_rim_GLR_LMLre         | Long run emphasis of GLRLM in Rim of VOI Prewitt filtered 1) 256-leveled T2-weighted image.                    |

|     |                                         |                                                                                                                                 |
|-----|-----------------------------------------|---------------------------------------------------------------------------------------------------------------------------------|
| 229 | T2_prewitt_rim_GLR<br>LMGln             | GRAY LEVEL NON-UNIFORMITY of GLRLM in Rim of VOI Prewitt filtered 1) 256-leveled T2-weighted image.                             |
| 230 | T2_prewitt_rim_GLR<br>LMRp              | RUN PERCENTAGE of GLRLM in Rim of VOI Prewitt filtered 1) 256-leveled T2-weighted image.                                        |
| 231 | T2_prewitt_rim_GLR<br>LMRln             | RUN LENGTH NON-UNIFORMITY in Rim of VOI Prewitt filtered 1) 256-leveled T2-weighted image.                                      |
| 232 | T2_prewitt_rim_GLR<br>LMLrge            | LOW GRAY LEVEL RUN EMPHASIS in Rim of VOI Prewitt filtered 1) 256-leveled T2-weighted image.                                    |
| 233 | T2_prewitt_rim_GLR<br>LMHrge            | HIGH GRAY LEVEL RUN EMPHASIS in Rim of VOI Prewitt filtered 1) 256-leveled T2-weighted image.                                   |
| 234 | T2_prewitt_rim_GLC<br>Mcontrast_1_SD    | Standard deviation of contrast of GLCM in Rim of VOI Prewitt filtered 1) 256-leveled T2-weighted image with offset set to 1.    |
| 235 | T2_prewitt_rim_GLC<br>Mcontrast_2_SD    | Standard deviation of contrast of GLCM in Rim of VOI Prewitt filtered 1) 256-leveled T2-weighted image with offset set to 2.    |
| 236 | T2_prewitt_rim_GLC<br>Mcontrast_3_SD    | Standard deviation of contrast of GLCM in Rim of VOI Prewitt filtered 1) 256-leveled T2-weighted image with offset set to 3.    |
| 237 | T2_prewitt_rim_GLC<br>Menergy_1_SD      | Standard deviation of energy of GLCM in Rim of VOI Prewitt filtered 1) 256-leveled T2-weighted image with offset set to 1.      |
| 238 | T2_prewitt_rim_GLC<br>Menergy_2_SD      | Standard deviation of energy of GLCM in Rim of VOI Prewitt filtered 1) 256-leveled T2-weighted image with offset set to 2.      |
| 239 | T2_prewitt_rim_GLC<br>Menergy_3_SD      | Standard deviation of energy of GLCM in Rim of VOI Prewitt filtered 1) 256-leveled T2-weighted image with offset set to 3.      |
| 240 | T2_prewitt_rim_GLC<br>Mhomogeneity_1_SD | Standard deviation of homogeneity of GLCM in Rim of VOI Prewitt filtered 1) 256-leveled T2-weighted image with offset set to 1. |
| 241 | T2_prewitt_rim_GLC<br>Mhomogeneity_2_SD | Standard deviation of homogeneity of GLCM in Rim of VOI Prewitt filtered 1) 256-leveled T2-weighted image with offset set to 2. |
| 242 | T2_prewitt_rim_GLC<br>Mhomogeneity_3_SD | Standard deviation of homogeneity of GLCM in Rim of VOI Prewitt filtered 1) 256-leveled T2-weighted image with offset set to 3. |
| 243 | T2_prewitt_rim_GLR<br>LMSre_SD          | Standard deviation of Short run emphasis of GLRLM in Rim of VOI Prewitt filtered 1) 256-leveled T2-weighted image.              |
| 244 | T2_prewitt_rim_GLR<br>LMLre_SD          | Standard deviation of Long run emphasis of GLRLM in Rim of VOI Prewitt filtered 1) 256-leveled T2-weighted image.               |
| 245 | T2_prewitt_rim_GLR<br>LMGln_SD          | Standard deviation of GRAY LEVEL NON-UNIFORMITY of GLRLM in Rim of VOI Prewitt filtered 1) 256-leveled T2-weighted image.       |
| 246 | T2_prewitt_rim_GLR<br>LMRp_SD           | Standard deviation of RUN PERCENTAGE of GLRLM in Rim of VOI Prewitt filtered 1) 256-leveled T2-weighted image.                  |
| 247 | T2_prewitt_rim_GLR<br>LMRln_SD          | Standard deviation of RUN LENGTH NON-UNIFORMITY in Rim of VOI Prewitt filtered 1) 256-leveled T2-weighted image.                |
| 248 | T2_prewitt_rim_GLR<br>LMLrge_SD         | Standard deviation of LOW GRAY LEVEL RUN EMPHASIS in Rim of VOI Prewitt filtered 1) 256-leveled T2-weighted image.              |
| 249 | T2_prewitt_rim_GLR<br>LMHrge_SD         | Standard deviation of HIGH GRAY LEVEL RUN EMPHASIS in Rim of VOI Prewitt filtered 1) 256-leveled T2-weighted image.             |

|     |                                         |                                                                                                                                                             |
|-----|-----------------------------------------|-------------------------------------------------------------------------------------------------------------------------------------------------------------|
| 250 | T2_prewitt_rim_GLC<br>Mcorrelation_1    | Correlation of GLCM in Rim of VOI Prewitt filtered 1) 256-leveled T2-weighted image with offset set to 1.                                                   |
| 251 | T2_prewitt_rim_GLC<br>Mcorrelation_2    | Correlation of GLCM in Rim of VOI Prewitt filtered 1) 256-leveled T2-weighted image with offset set to 2.                                                   |
| 252 | T2_prewitt_rim_GLC<br>Mcorrelation_3    | Correlation of GLCM in Rim of VOI Prewitt filtered 1) 256-leveled T2-weighted image with offset set to 3.                                                   |
| 253 | T2_prewitt_rim_GLC<br>Mcorrelation_1_SD | Standard deviation of Correlation of GLCM in Rim of VOI Prewitt filtered 1) 256-leveled T2-weighted image with offset set to 1.                             |
| 254 | T2_prewitt_rim_GLC<br>Mcorrelation_2_SD | Standard deviation of Correlation of GLCM in Rim of VOI Prewitt filtered 1) 256-leveled T2-weighted image with offset set to 2.                             |
| 255 | T2_prewitt_rim_GLC<br>Mcorrelation_3_SD | Standard deviation of Correlation of GLCM in Rim of VOI Prewitt filtered 1) 256-leveled T2-weighted image with offset set to 3.                             |
| 256 | core_on_MNI_Total_<br>Surface Area      | Total surface area ( $A$ ) of core_on_MNI.                                                                                                                  |
| 257 | core_on_MNI_Total_<br>Volume            | Total volume ( $V$ ) of core_on_MNI.                                                                                                                        |
| 258 | core_on_MNI_Compac<br>tness01           | Value calculated by the following equation of core_on_MNI;<br>$compactness1 = \frac{V}{\sqrt{\pi} * A^{\frac{2}{3}}}$                                       |
| 259 | core_on_MNI_Compac<br>tness02           | Value calculated by the following equation of core_on_MNI;<br>$compactness2 = 36\pi \frac{A^2}{V^3}$                                                        |
| 260 | core_on_MNI_Spheri<br>cal_Disporportion | Value calculated by the following equation of core_on_MNI;<br>$spherical\_disporportion = \frac{A}{4\pi * R^2} = \frac{A}{(6\sqrt{\pi} * V)^{\frac{2}{3}}}$ |
| 261 | core_on_MNI_Spheri<br>city              | Value calculated by the following equation of core_on_MNI;<br>$sphericity = \frac{(6\pi^2 V)^{\frac{2}{3}}}{A}$                                             |
| 262 | core_on_MNI_Surfac<br>e_to_Volume_ratio | Value calculated by the following equation of core_on_MNI;<br>$surface\_volume\_ratio = \frac{A}{V}$                                                        |
| 263 | edema_on_MNI_Total<br>Surface Area      | Total surface area ( $A$ ) of edema_on_MNI.                                                                                                                 |
| 264 | edema_on_MNI_Total<br>Volume            | Total volume ( $V$ ) of edema_on_MNI.                                                                                                                       |
| 265 | edema_on_MNI_Compac<br>tness01          | Value calculated by the following equation of edema_on_MNI;<br>$compactness1 = \frac{V}{\sqrt{\pi} * A^{\frac{2}{3}}}$                                      |
| 266 | edema_on_MNI_Compac<br>tness02          | Value calculated by the following equation of edema on MNI;                                                                                                 |

|     |                                           |                                                                                                                                                              |
|-----|-------------------------------------------|--------------------------------------------------------------------------------------------------------------------------------------------------------------|
|     |                                           | $compactness2 = 36\pi \frac{A^2}{V^3}$                                                                                                                       |
| 267 | edema_on_MNI_Spherical_Disporoportio<br>n | Value calculated by the following equation of edema_on_MNI;<br>$spherical\_disproportion = \frac{A}{4\pi * R^2} = \frac{A}{(6\sqrt{\pi} * V)^{\frac{2}{3}}}$ |
| 268 | edema_on_MNI_Spheric<br>icity             | Value calculated by the following equation of edema_on_MNI;<br>$sphericity = \frac{(6\pi^2 V)^{\frac{2}{3}}}{A}$                                             |
| 269 | edema_on_MNI_Surfa<br>ce_to_Volume_ratio  | Value calculated by the following equation of edema_on_MNI;<br>$surface\_volume\_ratio = \frac{A}{V}$                                                        |
| 270 | T1Gd_edema_GLCMcor<br>relation_1          | Correlation of GLCM in VOI_edema in 256-leveled Gadolinium enhanced T1-weighted image with offset set to 1.                                                  |
| 271 | T1Gd_edema_GLCMcor<br>relation_2          | Correlation of GLCM in VOI_edema in 256-leveled Gadolinium enhanced T1-weighted image with offset set to 2.                                                  |
| 272 | T1Gd_edema_GLCMcor<br>relation_3          | Correlation of GLCM in VOI_edema in 256-leveled Gadolinium enhanced T1-weighted image with offset set to 3.                                                  |
| 273 | T1Gd_edema_GLCMcor<br>relation_1_SD       | Standard deviation of Correlation of GLCM in VOI_edema in 256-leveled Gadolinium enhanced T1-weighted image with offset set to 1.                            |
| 274 | T1Gd_edema_GLCMcor<br>relation_2_SD       | Standard deviation of Correlation of GLCM in VOI_edema in 256-leveled Gadolinium enhanced T1-weighted image with offset set to 2.                            |
| 275 | T1Gd_edema_GLCMcor<br>relation_3_SD       | Standard deviation of Correlation of GLCM in VOI_edema in 256-leveled Gadolinium enhanced T1-weighted image with offset set to 3.                            |
| 276 | T1_core_Mean                              | Mean of VOI_core in 256-leveled T1-weighted image.                                                                                                           |
| 277 | T1_core_SD                                | Standard deviation of VOI_core in 256-leveled T1-weighted image.                                                                                             |
| 278 | T1_core_Var                               | Variance of VOI_core in 256-leveled T1-weighted image.                                                                                                       |
| 279 | T1_core_RMS                               | Root Mean Square of VOI_core in 256-leveled T1-weighted image.                                                                                               |
| 280 | T1_core_Max                               | Maximum of VOI_core in 256-leveled T1-weighted image.                                                                                                        |
| 281 | T1_core_Min                               | Minimum of VOI_core in 256-leveled T1-weighted image.                                                                                                        |
| 282 | T1_core_Median                            | Median of VOI_core in 256-leveled T1-weighted image.                                                                                                         |
| 283 | T1_core_Mode                              | Mode of VOI_core in 256-leveled T1-weighted image.                                                                                                           |
| 284 | T1_core_Entropy                           | Entropy of VOI_core in 256-leveled T1-weighted image.                                                                                                        |
| 285 | T1_core_Kurtosis                          | Kurtosis of VOI_core in 256-leveled T1-weighted image.                                                                                                       |
| 286 | T1_core_Skewness                          | Skewness of VOI_core in 256-leveled T1-weighted image.                                                                                                       |
| 287 | T1_core_GLCMcontra<br>st_1                | Mean contrast of GLCM in VOI_core in 256-leveled T1-weighted image with offset set to 1.                                                                     |

|     |                              |                                                                                                              |
|-----|------------------------------|--------------------------------------------------------------------------------------------------------------|
| 288 | T1_core_GLCMcontrast_2       | Mean contrast of GLCM in VOI_core in 256-leveled T1-weighted image with offset set to 2.                     |
| 289 | T1_core_GLCMcontrast_3       | Mean contrast of GLCM in VOI_core in 256-leveled T1-weighted image with offset set to 3.                     |
| 290 | T1_core_GLCMenergy_1         | Mean energy of GLCM in VOI_core in 256-leveled T1-weighted image with offset set to 1.                       |
| 291 | T1_core_GLCMenergy_2         | Mean energy of GLCM in VOI_core in 256-leveled T1-weighted image with offset set to 2.                       |
| 292 | T1_core_GLCMenergy_3         | Mean energy of GLCM in VOI_core in 256-leveled T1-weighted image with offset set to 3.                       |
| 293 | T1_core_GLCMhomogeneity_1    | Mean homogeneity of GLCM in VOI_core in 256-leveled T1-weighted image with offset set to 1.                  |
| 294 | T1_core_GLCMhomogeneity_2    | Mean homogeneity of GLCM in VOI_core in 256-leveled T1-weighted image with offset set to 2.                  |
| 295 | T1_core_GLCMhomogeneity_3    | Mean homogeneity of GLCM in VOI_core in 256-leveled T1-weighted image with offset set to 3.                  |
| 296 | T1_core_GLRLMSre             | Short run emphasis of GLRLM in VOI_core in 256-leveled T1-weighted image.                                    |
| 297 | T1_core_GLRLMLre             | Long run emphasis of GLRLM in VOI_core in 256-leveled T1-weighted image.                                     |
| 298 | T1_core_GLRLMGLn             | GRAY LEVEL NON-UNIFORMITY of GLRLM in VOI_core in 256-leveled T1-weighted image.                             |
| 299 | T1_core_GLRLMRp              | RUN PERCENTAGE of GLRLM in VOI_core in 256-leveled T1-weighted image.                                        |
| 300 | T1_core_GLRLMRln             | RUN LENGTH NON-UNIFORMITY in VOI_core in 256-leveled T1-weighted image.                                      |
| 301 | T1_core_GLRLMLrge            | LOW GRAY LEVEL RUN EMPHASIS in VOI_core in 256-leveled T1-weighted image.                                    |
| 302 | T1_core_GLRLMhrge            | HIGH GRAY LEVEL RUN EMPHASIS in VOI_core in 256-leveled T1-weighted image.                                   |
| 303 | T1_core_GLCMcontrast_1_SD    | Standard deviation of contrast of GLCM in VOI_core in 256-leveled T1-weighted image with offset set to 1.    |
| 304 | T1_core_GLCMcontrast_2_SD    | Standard deviation of contrast of GLCM in VOI_core in 256-leveled T1-weighted image with offset set to 2.    |
| 305 | T1_core_GLCMcontrast_3_SD    | Standard deviation of contrast of GLCM in VOI_core in 256-leveled T1-weighted image with offset set to 3.    |
| 306 | T1_core_GLCMenergy_1_SD      | Standard deviation of energy of GLCM in VOI_core in 256-leveled T1-weighted image with offset set to 1.      |
| 307 | T1_core_GLCMenergy_2_SD      | Standard deviation of energy of GLCM in VOI_core in 256-leveled T1-weighted image with offset set to 2.      |
| 308 | T1_core_GLCMenergy_3_SD      | Standard deviation of energy of GLCM in VOI_core in 256-leveled T1-weighted image with offset set to 3.      |
| 309 | T1_core_GLCMhomogeneity_1_SD | Standard deviation of homogeneity of GLCM in VOI_core in 256-leveled T1-weighted image with offset set to 1. |
| 310 | T1_core_GLCMhomogeneity_2_SD | Standard deviation of homogeneity of GLCM in VOI_core in 256-leveled T1-weighted image with offset set to 2. |
| 311 | T1_core_GLCMhomogeneity_3_SD | Standard deviation of homogeneity of GLCM in VOI_core in 256-leveled T1-weighted image with offset set to 3. |
| 312 | T1_core_GLRLMSre_SD          | Standard deviation of Short run emphasis of GLRLM in VOI_core in 256-leveled T1-weighted image.              |

|     |                            |                                                                                                        |
|-----|----------------------------|--------------------------------------------------------------------------------------------------------|
| 313 | T1_core_GLRLMLre_SD        | Standard deviation of Long run emphasis of GLRLM in VOI_core in 256-leveled T1-weighted image.         |
| 314 | T1_core_GLRLMGLn_SD        | Standard deviation of GRAY LEVEL NON-UNIFORMITY of GLRLM in VOI_core in 256-leveled T1-weighted image. |
| 315 | T1_core_GLRLMRp_SD         | Standard deviation of RUN PERCENTAGE of GLRLM in VOI_core in 256-leveled T1-weighted image.            |
| 316 | T1_core_GLRLMRln_SD        | Standard deviation of RUN LENGTH NON-UNIFORMITY in VOI_core in 256-leveled T1-weighted image.          |
| 317 | T1_core_GLRLMLrge_SD       | Standard deviation of LOW GRAY LEVEL RUN EMPHASIS in VOI_core in 256-leveled T1-weighted image.        |
| 318 | T1_core_GLRLMhrge_SD       | Standard deviation of HIGH GRAY LEVEL RUN EMPHASIS in VOI_core in 256-leveled T1-weighted image.       |
| 319 | T1_edema_Mean              | Mean of VOI_edema in 256-leveled T1-weighted image.                                                    |
| 320 | T1_edema_SD                | Standard deviation of VOI_edema in 256-leveled T1-weighted image.                                      |
| 321 | T1_edema_Var               | Variance of VOI_edema in 256-leveled T1-weighted image.                                                |
| 322 | T1_edema_RMS               | Root Mean Square of VOI_edema in 256-leveled T1-weighted image.                                        |
| 323 | T1_edema_Max               | Maximum of VOI_edema in 256-leveled T1-weighted image.                                                 |
| 324 | T1_edema_Min               | Minimum of VOI_edema in 256-leveled T1-weighted image.                                                 |
| 325 | T1_edema_Median            | Median of VOI_edema in 256-leveled T1-weighted image.                                                  |
| 326 | T1_edema_Mode              | Mode of VOI_edema in 256-leveled T1-weighted image.                                                    |
| 327 | T1_edema_Entropy           | Entropy of VOI_edema in 256-leveled T1-weighted image.                                                 |
| 328 | T1_edema_Kurtosis          | Kurtosis of VOI_edema in 256-leveled T1-weighted image.                                                |
| 329 | T1_edema_Skewness          | Skewness of VOI_edema in 256-leveled T1-weighted image.                                                |
| 330 | T1_edema_GLCMcontrast_1    | Mean contrast of GLCM in VOI_edema in 256-leveled T1-weighted image with offset set to 1.              |
| 331 | T1_edema_GLCMcontrast_2    | Mean contrast of GLCM in VOI_edema in 256-leveled T1-weighted image with offset set to 2.              |
| 332 | T1_edema_GLCMcontrast_3    | Mean contrast of GLCM in VOI_edema in 256-leveled T1-weighted image with offset set to 3.              |
| 333 | T1_edema_GLCMenergy_1      | Mean energy of GLCM in VOI_edema in 256-leveled T1-weighted image with offset set to 1.                |
| 334 | T1_edema_GLCMenergy_2      | Mean energy of GLCM in VOI_edema in 256-leveled T1-weighted image with offset set to 2.                |
| 335 | T1_edema_GLCMenergy_3      | Mean energy of GLCM in VOI_edema in 256-leveled T1-weighted image with offset set to 3.                |
| 336 | T1_edema_GLCMhomogeneity_1 | Mean homogeneity of GLCM in VOI_edema in 256-leveled T1-weighted image with offset set to 1.           |
| 337 | T1_edema_GLCMhomogeneity_2 | Mean homogeneity of GLCM in VOI_edema in 256-leveled T1-weighted image with offset set to 2.           |
| 338 | T1_edema_GLCMhomogeneity_3 | Mean homogeneity of GLCM in VOI_edema in 256-leveled T1-weighted image with offset set to 3.           |
| 339 | T1_edema_GLRLMSre          | Short run emphasis of GLRLM in VOI_edema in 256-leveled T1-weighted image.                             |
| 340 | T1_edema_GLRLMLre          | Long run emphasis of GLRLM in VOI_edema in 256-leveled T1-weighted image.                              |
| 341 | T1_edema_GLRLMGLn          | GRAY LEVEL NON-UNIFORMITY of GLRLM in VOI_edema in 256-leveled T1-weighted image.                      |



|     |                               |                                                                                                                |
|-----|-------------------------------|----------------------------------------------------------------------------------------------------------------|
| 342 | T1_edema_GLRLMRp              | RUN PERCENTAGE of GLRLM in VOI_edema in 256-levelled T1-weighted image.                                        |
| 343 | T1_edema_GLRLMRln             | RUN LENGTH NON-UNIFORMITY in VOI_edema in 256-levelled T1-weighted image.                                      |
| 344 | T1_edema_GLRLMLrge            | LOW GRAY LEVEL RUN EMPHASIS in VOI_edema in 256-levelled T1-weighted image.                                    |
| 345 | T1_edema_GLRLMhrge            | HIGH GRAY LEVEL RUN EMPHASIS in VOI_edema in 256-levelled T1-weighted image.                                   |
| 346 | T1_edema_GLCMcontrast_1_SD    | Standard deviation of contrast of GLCM in VOI_edema in 256-levelled T1-weighted image with offset set to 1.    |
| 347 | T1_edema_GLCMcontrast_2_SD    | Standard deviation of contrast of GLCM in VOI_edema in 256-levelled T1-weighted image with offset set to 2.    |
| 348 | T1_edema_GLCMcontrast_3_SD    | Standard deviation of contrast of GLCM in VOI_edema in 256-levelled T1-weighted image with offset set to 3.    |
| 349 | T1_edema_GLCMenergy_1_SD      | Standard deviation of energy of GLCM in VOI_edema in 256-levelled T1-weighted image with offset set to 1.      |
| 350 | T1_edema_GLCMenergy_2_SD      | Standard deviation of energy of GLCM in VOI_edema in 256-levelled T1-weighted image with offset set to 2.      |
| 351 | T1_edema_GLCMenergy_3_SD      | Standard deviation of energy of GLCM in VOI_edema in 256-levelled T1-weighted image with offset set to 3.      |
| 352 | T1_edema_GLCMhomogeneity_1_SD | Standard deviation of homogeneity of GLCM in VOI_edema in 256-levelled T1-weighted image with offset set to 1. |
| 353 | T1_edema_GLCMhomogeneity_2_SD | Standard deviation of homogeneity of GLCM in VOI_edema in 256-levelled T1-weighted image with offset set to 2. |
| 354 | T1_edema_GLCMhomogeneity_3_SD | Standard deviation of homogeneity of GLCM in VOI_edema in 256-levelled T1-weighted image with offset set to 3. |
| 355 | T1_edema_GLRLMSre_SD          | Standard deviation of Short run emphasis of GLRLM in VOI_edema in 256-levelled T1-weighted image.              |
| 356 | T1_edema_GLRLMLre_SD          | Standard deviation of Long run emphasis of GLRLM in VOI_edema in 256-levelled T1-weighted image.               |
| 357 | T1_edema_GLRLMGln_SD          | Standard deviation of GRAY LEVEL NON-UNIFORMITY of GLRLM in VOI_edema in 256-levelled T1-weighted image.       |
| 358 | T1_edema_GLRLMRp_SD           | Standard deviation of RUN PERCENTAGE of GLRLM in VOI_edema in 256-levelled T1-weighted image.                  |
| 359 | T1_edema_GLRLMRln_SD          | Standard deviation of RUN LENGTH NON-UNIFORMITY in VOI_edema in 256-levelled T1-weighted image.                |
| 360 | T1_edema_GLRLMLrge_SD         | Standard deviation of LOW GRAY LEVEL RUN EMPHASIS in VOI_edema in 256-levelled T1-weighted image.              |
| 361 | T1_edema_GLRLMhrge_SD         | Standard deviation of HIGH GRAY LEVEL RUN EMPHASIS in VOI_edema in 256-levelled T1-weighted image.             |
| 362 | T2_edema_GLCMcorrelation_1    | Correlation of GLCM in VOI_edema in 256-levelled T2-weighted image with offset set to 1.                       |
| 363 | T2_edema_GLCMcorrelation_2    | Correlation of GLCM in VOI_edema in 256-levelled T2-weighted image with offset set to 2.                       |
| 364 | T2_edema_GLCMcorrelation_3    | Correlation of GLCM in VOI_edema in 256-levelled T2-weighted image with offset set to 3.                       |

|     |                                |                                                                                                               |
|-----|--------------------------------|---------------------------------------------------------------------------------------------------------------|
| 365 | T2_edema_GLCMcorrelation_1_SD  | Standard deviation of Correlation of GLCM in VOI_edema in 256-leveled T2-weighted image with offset set to 1. |
| 366 | T2_edema_GLCMcorrelation_2_SD  | Standard deviation of Correlation of GLCM in VOI_edema in 256-leveled T2-weighted image with offset set to 2. |
| 367 | T2_edema_GLCMcorrelation_3_SD  | Standard deviation of Correlation of GLCM in VOI_edema in 256-leveled T2-weighted image with offset set to 3. |
| 368 | z_score_core Mean              | Mean of VOI_core in Gdzscore 2).                                                                              |
| 369 | z_score_core SD                | Standard deviation of VOI_core in Gdzscore 2).                                                                |
| 370 | z_score_core Var               | Variance of VOI_core in Gdzscore 2).                                                                          |
| 371 | z_score_core RMS               | Root Mean Square of VOI_core in Gdzscore 2).                                                                  |
| 372 | z_score_core Max               | Maximum of VOI_core in Gdzscore 2).                                                                           |
| 373 | z_score_core Min               | Minimum of VOI_core in Gdzscore 2).                                                                           |
| 374 | z_score_core Median            | Median of VOI_core in Gdzscore 2).                                                                            |
| 375 | z_score_core Mode              | Mode of VOI_core in Gdzscore 2).                                                                              |
| 376 | z_score_core Entropy           | Entropy of VOI_core in Gdzscore 2).                                                                           |
| 377 | z_score_core Kurtosis          | Kurtosis of VOI_core in Gdzscore 2).                                                                          |
| 378 | z_score_core Skewness          | Skewness of VOI_core in Gdzscore 2).                                                                          |
| 379 | z_score_core_GLCMcontrast_1    | Mean contrast of GLCM in VOI_core in Gdzscore 2) with offset set to 1.                                        |
| 380 | z_score_core_GLCMcontrast_2    | Mean contrast of GLCM in VOI_core in Gdzscore 2) with offset set to 2.                                        |
| 381 | z_score_core_GLCMcontrast_3    | Mean contrast of GLCM in VOI_core in Gdzscore 2) with offset set to 3.                                        |
| 382 | z_score_core_GLCMenergy_1      | Mean energy of GLCM in VOI_core in Gdzscore 2) with offset set to 1.                                          |
| 383 | z_score_core_GLCMenergy_2      | Mean energy of GLCM in VOI_core in Gdzscore 2) with offset set to 2.                                          |
| 384 | z_score_core_GLCMenergy_3      | Mean energy of GLCM in VOI_core in Gdzscore 2) with offset set to 3.                                          |
| 385 | z_score_core_GLCMhomogeneity_1 | Mean homogeneity of GLCM in VOI_core in Gdzscore 2) with offset set to 1.                                     |
| 386 | z_score_core_GLCMhomogeneity_2 | Mean homogeneity of GLCM in VOI_core in Gdzscore 2) with offset set to 2.                                     |
| 387 | z_score_core_GLCMhomogeneity_3 | Mean homogeneity of GLCM in VOI_core in Gdzscore 2) with offset set to 3.                                     |
| 388 | z_score_core_GLRLMSre          | Short run emphasis of GLRLM in VOI_core in Gdzscore 2).                                                       |
| 389 | z_score_core_GLRLMLre          | Long run emphasis of GLRLM in VOI_core in Gdzscore 2).                                                        |
| 390 | z_score_core_GLRLMGln          | GRAY LEVEL NON-UNIFORMITY of GLRLM in VOI_core in Gdzscore 2).                                                |
| 391 | z_score_core_GLRLMRp           | RUN PERCENTAGE of GLRLM in VOI_core in Gdzscore 2).                                                           |
| 392 | z_score_core_GLRLMRln          | RUN LENGTH NON-UNIFORMITY in VOI_core in Gdzscore 2).                                                         |
| 393 | z_score_core_GLRLMLrge         | LOW GRAY LEVEL RUN EMPHASIS in VOI_core in Gdzscore 2).                                                       |
| 394 | z_score_core_GLRLM Hrge        | HIGH GRAY LEVEL RUN EMPHASIS in VOI_core in Gdzscore 2).                                                      |
| 395 | z_score_core_GLCMcontrast_1_SD | Standard deviation of contrast of GLCM in VOI_core in Gdzscore 2) with offset set to 1.                       |
| 396 | z_score_core_GLCMcontrast_2_SD | Standard deviation of contrast of GLCM in VOI_core in Gdzscore 2) with offset set to 2.                       |

|     |                                       |                                                                                            |
|-----|---------------------------------------|--------------------------------------------------------------------------------------------|
| 397 | z_score_core_GLCMc<br>ontrast 3 SD    | Standard deviation of contrast of GLCM in VOI_core in Gdzscore 2) with offset set to 3.    |
| 398 | z_score_core_GLCMe<br>nergy 1 SD      | Standard deviation of energy of GLCM in VOI_core in Gdzscore 2) with offset set to 1.      |
| 399 | z_score_core_GLCMe<br>nergy 2 SD      | Standard deviation of energy of GLCM in VOI_core in Gdzscore 2) with offset set to 2.      |
| 400 | z_score_core_GLCMe<br>nergy 3 SD      | Standard deviation of energy of GLCM in VOI_core in Gdzscore 2) with offset set to 3.      |
| 401 | z_score_core_GLCMh<br>omogeniety 1 SD | Standard deviation of homogeneity of GLCM in VOI_core in Gdzscore 2) with offset set to 1. |
| 402 | z_score_core_GLCMh<br>omogeniety 2 SD | Standard deviation of homogeneity of GLCM in VOI_core in Gdzscore 2) with offset set to 2. |
| 403 | z_score_core_GLCMh<br>omogeniety 3 SD | Standard deviation of homogeneity of GLCM in VOI_core in Gdzscore 2) with offset set to 3. |
| 404 | z_score_core_GLRLM<br>Sre SD          | Standard deviation of Short run emphasis of GLRLM in VOI_core in Gdzscore 2).              |
| 405 | z_score_core_GLRLM<br>Lre SD          | Standard deviation of Long run emphasis of GLRLM in VOI_core in Gdzscore 2).               |
| 406 | z_score_core_GLRLM<br>Gln SD          | Standard deviation of GRAY LEVEL NON-UNIFORMITY of GLRLM in VOI_core in Gdzscore 2).       |
| 407 | z_score_core_GLRLM<br>Rp SD           | Standard deviation of RUN PERCENTAGE of GLRLM in VOI_core in Gdzscore 2).                  |
| 408 | z_score_core_GLRLM<br>Rln SD          | Standard deviation of RUN LENGTH NON-UNIFORMITY in VOI_core in Gdzscore 2).                |
| 409 | z_score_core_GLRLM<br>Lrge SD         | Standard deviation of LOW GRAY LEVEL RUN EMPHASIS in VOI_core in Gdzscore 2).              |
| 410 | z_score_core_GLRLM<br>Hrge SD         | Standard deviation of HIGH GRAY LEVEL RUN EMPHASIS in VOI_core in Gdzscore 2).             |
| 411 | z_score_edema Mean                    | Mean of VOI_edema in Gdzscore 2).                                                          |
| 412 | z_score_edema SD                      | Standard deviation of VOI_edema in Gdzscore 2).                                            |
| 413 | z_score_edema Var                     | Variance of VOI_edema in Gdzscore 2).                                                      |
| 414 | z_score_edema RMS                     | Root Mean Square of VOI_edema in Gdzscore 2).                                              |
| 415 | z_score_edema Max                     | Maximum of VOI_edema in Gdzscore 2).                                                       |
| 416 | z_score_edema Min                     | Minimum of VOI_edema in Gdzscore 2).                                                       |
| 417 | z_score_edema_Medi<br>an              | Median of VOI_edema in Gdzscore 2).                                                        |
| 418 | z_score_edema Mode                    | Mode of VOI_edema in Gdzscore 2).                                                          |
| 419 | z_score_edema_Entr<br>opy             | Entropy of VOI_edema in Gdzscore 2).                                                       |
| 420 | z_score_edema_Kurt<br>osis            | Kurtosis of VOI_edema in Gdzscore 2).                                                      |
| 421 | z_score_edema_Skew<br>ness            | Skewness of VOI_edema in Gdzscore 2).                                                      |
| 422 | z_score_edema_GLCM<br>contrast 1      | Mean contrast of GLCM in VOI_edema in Gdzscore 2) with offset set to 1.                    |
| 423 | z_score_edema_GLCM<br>contrast 2      | Mean contrast of GLCM in VOI_edema in Gdzscore 2) with offset set to 2.                    |
| 424 | z_score_edema_GLCM<br>contrast 3      | Mean contrast of GLCM in VOI_edema in Gdzscore 2) with offset set to 3.                    |
| 425 | z_score_edema_GLCM<br>energy 1        | Mean energy of GLCM in VOI_edema in Gdzscore 2) with offset set to 1.                      |
| 426 | z_score_edema_GLCM<br>energy 2        | Mean energy of GLCM in VOI_edema in Gdzscore 2) with offset set to 2.                      |
| 427 | z_score_edema_GLCM<br>energy 3        | Mean energy of GLCM in VOI_edema in Gdzscore 2) with offset set to 3.                      |
| 428 | z_score_edema_GLCM<br>homogeniety 1   | Mean homogeneity of GLCM in VOI_edema in Gdzscore 2) with offset set to 1.                 |
| 429 | z_score_edema_GLCM<br>homogeniety 2   | Mean homogeneity of GLCM in VOI_edema in Gdzscore 2) with offset set to 2.                 |
| 430 | z_score_edema_GLCM<br>homogeniety 3   | Mean homogeneity of GLCM in VOI_edema in Gdzscore 2) with offset set to 3.                 |

|     |                                        |                                                                                                               |
|-----|----------------------------------------|---------------------------------------------------------------------------------------------------------------|
| 431 | z_score_edema_GLRL<br>MSre             | Short run emphasis of GLRLM in VOI_edema in Gdzscore 2).                                                      |
| 432 | z_score_edema_GLRL<br>MLre             | Long run emphasis of GLRLM in VOI_edema in Gdzscore 2).                                                       |
| 433 | z_score_edema_GLRL<br>MGl n            | GRAY LEVEL NON-UNIFORMITY of GLRLM in VOI_edema in Gdzscore 2).                                               |
| 434 | z_score_edema_GLRL<br>MRp              | RUN PERCENTAGE of GLRLM in VOI_edema in Gdzscore 2).                                                          |
| 435 | z_score_edema_GLRL<br>MRl n            | RUN LENGTH NON-UNIFORMITY in VOI_edema in Gdzscore 2).                                                        |
| 436 | z_score_edema_GLRL<br>MLrge            | LOW GRAY LEVEL RUN EMPHASIS in VOI_edema in Gdzscore 2).                                                      |
| 437 | z_score_edema_GLRL<br>MHRge            | HIGH GRAY LEVEL RUN EMPHASIS in VOI_edema in Gdzscore 2).                                                     |
| 438 | z_score_edema_GLCM<br>contrast 1 SD    | Standard deviation of contrast of GLCM in VOI_edema in Gdzscore 2) with offset set to 1.                      |
| 439 | z_score_edema_GLCM<br>contrast 2 SD    | Standard deviation of contrast of GLCM in VOI_edema in Gdzscore 2) with offset set to 2.                      |
| 440 | z_score_edema_GLCM<br>contrast 3 SD    | Standard deviation of contrast of GLCM in VOI_edema in Gdzscore 2) with offset set to 3.                      |
| 441 | z_score_edema_GLCM<br>energy 1 SD      | Standard deviation of energy of GLCM in VOI_edema in Gdzscore 2) with offset set to 1.                        |
| 442 | z_score_edema_GLCM<br>energy 2 SD      | Standard deviation of energy of GLCM in VOI_edema in Gdzscore 2) with offset set to 2.                        |
| 443 | z_score_edema_GLCM<br>energy 3 SD      | Standard deviation of energy of GLCM in VOI_edema in Gdzscore 2) with offset set to 3.                        |
| 444 | z_score_edema_GLCM<br>homogeniety 1 SD | Standard deviation of homogeneity of GLCM in VOI_edema in Gdzscore 2) with offset set to 1.                   |
| 445 | z_score_edema_GLCM<br>homogeniety 2 SD | Standard deviation of homogeneity of GLCM in VOI_edema in Gdzscore 2) with offset set to 2.                   |
| 446 | z_score_edema_GLCM<br>homogeniety 3 SD | Standard deviation of homogeneity of GLCM in VOI_edema in Gdzscore 2) with offset set to 3.                   |
| 447 | z_score_edema_GLRL<br>MSre SD          | Standard deviation of Short run emphasis of GLRLM in VOI_edema in Gdzscore 2).                                |
| 448 | z_score_edema_GLRL<br>MLre SD          | Standard deviation of Long run emphasis of GLRLM in VOI_edema in Gdzscore 2).                                 |
| 449 | z_score_edema_GLRL<br>MGl n SD         | Standard deviation of GRAY LEVEL NON-UNIFORMITY of GLRLM in VOI_edema in Gdzscore 2).                         |
| 450 | z_score_edema_GLRL<br>MRp SD           | Standard deviation of RUN PERCENTAGE of GLRLM in VOI_edema in Gdzscore 2).                                    |
| 451 | z_score_edema_GLRL<br>MRl n SD         | Standard deviation of RUN LENGTH NON-UNIFORMITY in VOI_edema in Gdzscore 2).                                  |
| 452 | z_score_edema_GLRL<br>MLrge SD         | Standard deviation of LOW GRAY LEVEL RUN EMPHASIS in VOI_edema in Gdzscore 2).                                |
| 453 | z_score_edema_GLRL<br>MHRge SD         | Standard deviation of HIGH GRAY LEVEL RUN EMPHASIS in VOI_edema in Gdzscore 2).                               |
| 454 | T1_edema_GLCMcorre<br>lation 1         | Correlation of GLCM in VOI_edema in 256-leveled T1-weighted image with offset set to 1.                       |
| 455 | T1_edema_GLCMcorre<br>lation 2         | Correlation of GLCM in VOI_edema in 256-leveled T1-weighted image with offset set to 2.                       |
| 456 | T1_edema_GLCMcorre<br>lation 3         | Correlation of GLCM in VOI_edema in 256-leveled T1-weighted image with offset set to 3.                       |
| 457 | T1_edema_GLCMcorre<br>lation_1_SD      | Standard deviation of Correlation of GLCM in VOI_edema in 256-leveled T1-weighted image with offset set to 1. |
| 458 | T1_edema_GLCMcorre<br>lation_2_SD      | Standard deviation of Correlation of GLCM in VOI_edema in 256-leveled T1-weighted image with offset set to 2. |
| 459 | T1_edema_GLCMcorre<br>lation_3_SD      | Standard deviation of Correlation of GLCM in VOI_edema in 256-leveled T1-weighted image with offset set to 3. |

|     |                                     |                                                                                                                                  |
|-----|-------------------------------------|----------------------------------------------------------------------------------------------------------------------------------|
| 460 | z_score_edema_GLCM correlation 1    | Correlation of GLCM in VOI_edema in Gdzscore 2) with offset set to 1.                                                            |
| 461 | z_score_edema_GLCM correlation 2    | Correlation of GLCM in VOI_edema in Gdzscore 2) with offset set to 2.                                                            |
| 462 | z_score_edema_GLCM correlation 3    | Correlation of GLCM in VOI_edema in Gdzscore 2) with offset set to 3.                                                            |
| 463 | z_score_edema_GLCM correlation 1 SD | Standard deviation of Correlation of GLCM in VOI_edema in Gdzscore 2) with offset set to 1.                                      |
| 464 | z_score_edema_GLCM correlation 2 SD | Standard deviation of Correlation of GLCM in VOI_edema in Gdzscore 2) with offset set to 2.                                      |
| 465 | z_score_edema_GLCM correlation 3 SD | Standard deviation of Correlation of GLCM in VOI_edema in Gdzscore 2) with offset set to 3.                                      |
| 466 | T1_core_GLCMcorrelation 1           | Correlation of GLCM in VOI_core in 256-leveled T1-weighted image with offset set to 1.                                           |
| 467 | T1_core_GLCMcorrelation 2           | Correlation of GLCM in VOI_core in 256-leveled T1-weighted image with offset set to 2.                                           |
| 468 | T1_core_GLCMcorrelation 3           | Correlation of GLCM in VOI_core in 256-leveled T1-weighted image with offset set to 3.                                           |
| 469 | T1_core_GLCMcorrelation_1_SD        | Standard deviation of Correlation of GLCM in VOI_core in 256-leveled T1-weighted image with offset set to 1.                     |
| 470 | T1_core_GLCMcorrelation_2_SD        | Standard deviation of Correlation of GLCM in VOI_core in 256-leveled T1-weighted image with offset set to 2.                     |
| 471 | T1_core_GLCMcorrelation_3_SD        | Standard deviation of Correlation of GLCM in VOI_core in 256-leveled T1-weighted image with offset set to 3.                     |
| 472 | T2_core_GLCMcorrelation 1           | Correlation of GLCM in VOI_core in 256-leveled T2-weighted image with offset set to 1.                                           |
| 473 | T2_core_GLCMcorrelation 2           | Correlation of GLCM in VOI_core in 256-leveled T2-weighted image with offset set to 2.                                           |
| 474 | T2_core_GLCMcorrelation 3           | Correlation of GLCM in VOI_core in 256-leveled T2-weighted image with offset set to 3.                                           |
| 475 | T2_core_GLCMcorrelation_1_SD        | Standard deviation of Correlation of GLCM in VOI_core in 256-leveled T2-weighted image with offset set to 1.                     |
| 476 | T2_core_GLCMcorrelation_2_SD        | Standard deviation of Correlation of GLCM in VOI_core in 256-leveled T2-weighted image with offset set to 2.                     |
| 477 | T2_core_GLCMcorrelation_3_SD        | Standard deviation of Correlation of GLCM in VOI_core in 256-leveled T2-weighted image with offset set to 3.                     |
| 478 | T1Gd_core_GLCMcorrelation_1         | Correlation of GLCM in VOI_core in 256-leveled Gadolinium enhanced T1-weighted image with offset set to 1.                       |
| 479 | T1Gd_core_GLCMcorrelation_2         | Correlation of GLCM in VOI_core in 256-leveled Gadolinium enhanced T1-weighted image with offset set to 2.                       |
| 480 | T1Gd_core_GLCMcorrelation_3         | Correlation of GLCM in VOI_core in 256-leveled Gadolinium enhanced T1-weighted image with offset set to 3.                       |
| 481 | T1Gd_core_GLCMcorrelation_1_SD      | Standard deviation of Correlation of GLCM in VOI_core in 256-leveled Gadolinium enhanced T1-weighted image with offset set to 1. |
| 482 | T1Gd_core_GLCMcorrelation_2_SD      | Standard deviation of Correlation of GLCM in VOI_core in 256-leveled T2-weighted image with offset set to 2.                     |
| 483 | T1Gd_core_GLCMcorrelation_3_SD      | Standard deviation of Correlation of GLCM in VOI_core in 256-leveled T2-weighted image with offset set to 3.                     |

|     |                                       |                                                                                               |
|-----|---------------------------------------|-----------------------------------------------------------------------------------------------|
| 484 | z_score_core_GLCMc<br>orrelation 1    | Correlation of GLCM in VOI_core in Gdzscore 2)<br>with offset set to 1.                       |
| 485 | z_score_core_GLCMc<br>orrelation 2    | Correlation of GLCM in VOI_core in Gdzscore 2)<br>with offset set to 2.                       |
| 486 | z_score_core_GLCMc<br>orrelation 3    | Correlation of GLCM in VOI_core in Gdzscore 2)<br>with offset set to 3.                       |
| 487 | z_score_core_GLCMc<br>orrelation 1 SD | Standard deviation of Correlation of GLCM in<br>VOI_core in Gdzscore 2) with offset set to 1. |
| 488 | z_score_core_GLCMc<br>orrelation 2 SD | Standard deviation of Correlation of GLCM in<br>VOI_core in Gdzscore 2) with offset set to 2. |
| 489 | z_score_core_GLCMc<br>orrelation 3 SD | Standard deviation of Correlation of GLCM in<br>VOI_core in Gdzscore 2) with offset set to 3. |

- 1) Prewitt filtering was performed by applying first order horizontal G<sub>x</sub> and vertical G<sub>y</sub> differentiation and by calculating the magnitude G, where G<sub>x</sub> and G<sub>y</sub> stands for the horizontal and vertical gradient of the image respectively and A for the original two-dimensional gray scale image

$$G_x = \begin{bmatrix} -1 & 0 & +1 \\ -1 & 0 & +1 \\ -1 & 0 & +1 \end{bmatrix} * A, \quad G_y = \begin{bmatrix} -1 & -1 & -1 \\ 0 & 0 & 0 \\ +1 & +1 & +1 \end{bmatrix} * A, \quad G = \sqrt{G_x^2 + G_y^2}$$

- 2) Gdzscore image was created by visualizing the magnitude of enhancement calculated from both 256-leveled non-enhanced and Gadolinium-enhanced T1-weighted images. 256-leveled Gadolinium-enhanced T1-weighted images was plotted as a function of 256-leveled non-enhanced T1-weighted images in whole brain. Linear regression fitting was applied to the data obtained, which can be expressed as follows;

$$(GdT1WI) = \alpha(T1WI) + \beta$$

where (GdT1WI) and (T1WI) are 256-leveled Gadolinium-enhanced and non-enhanced T1-weighted images. By solving  $\alpha$  and  $\beta$ , one can now determine the linear correlation of 256-leveled Gadolinium-enhanced and non-enhanced T1-weighted images.

Next, the magnitude of deviation from the above solved linear regression line for any particular voxel (*i*) can be expressed as follows:

$$deviation_i = \frac{(GdT1WI)_i - \alpha(T1WI)_i - \beta}{\sqrt{\alpha^2 + 1}}$$

where (GdT1WI)<sub>*i*</sub> and (T1WI)<sub>*i*</sub> are the 256-leveled values of voxel (*i*) in Gadolinium-enhanced and non-enhanced T1-weighted images.

Finally, the Gdzscore of each data point was defined as follows

$$Gdzscore_i = \frac{deviation_i - \mu}{\rho}$$

where  $\mu$  and  $\sigma$  are the means and standard deviation of  $deviation_i$  in the whole brain.
